# Supplementary material for: Interpretable Machine Learning Model Based on Intra- and Peritumoral MRI Radiomics for Predicting Biochemical Recurrence After Radical Prostatectomy
Source: Research Square preprint supplement (doi:10.21203/rs.3.rs-7173672/v1), 2025-07-28
Supplement: Supplementary file 1 [file 38c4e585c4a03f59dccab23e.docx]

**Supplementary Figure 1** Flowchart illustrating patient selection process with inclusion/exclusion criteria, and cohort partitioning.


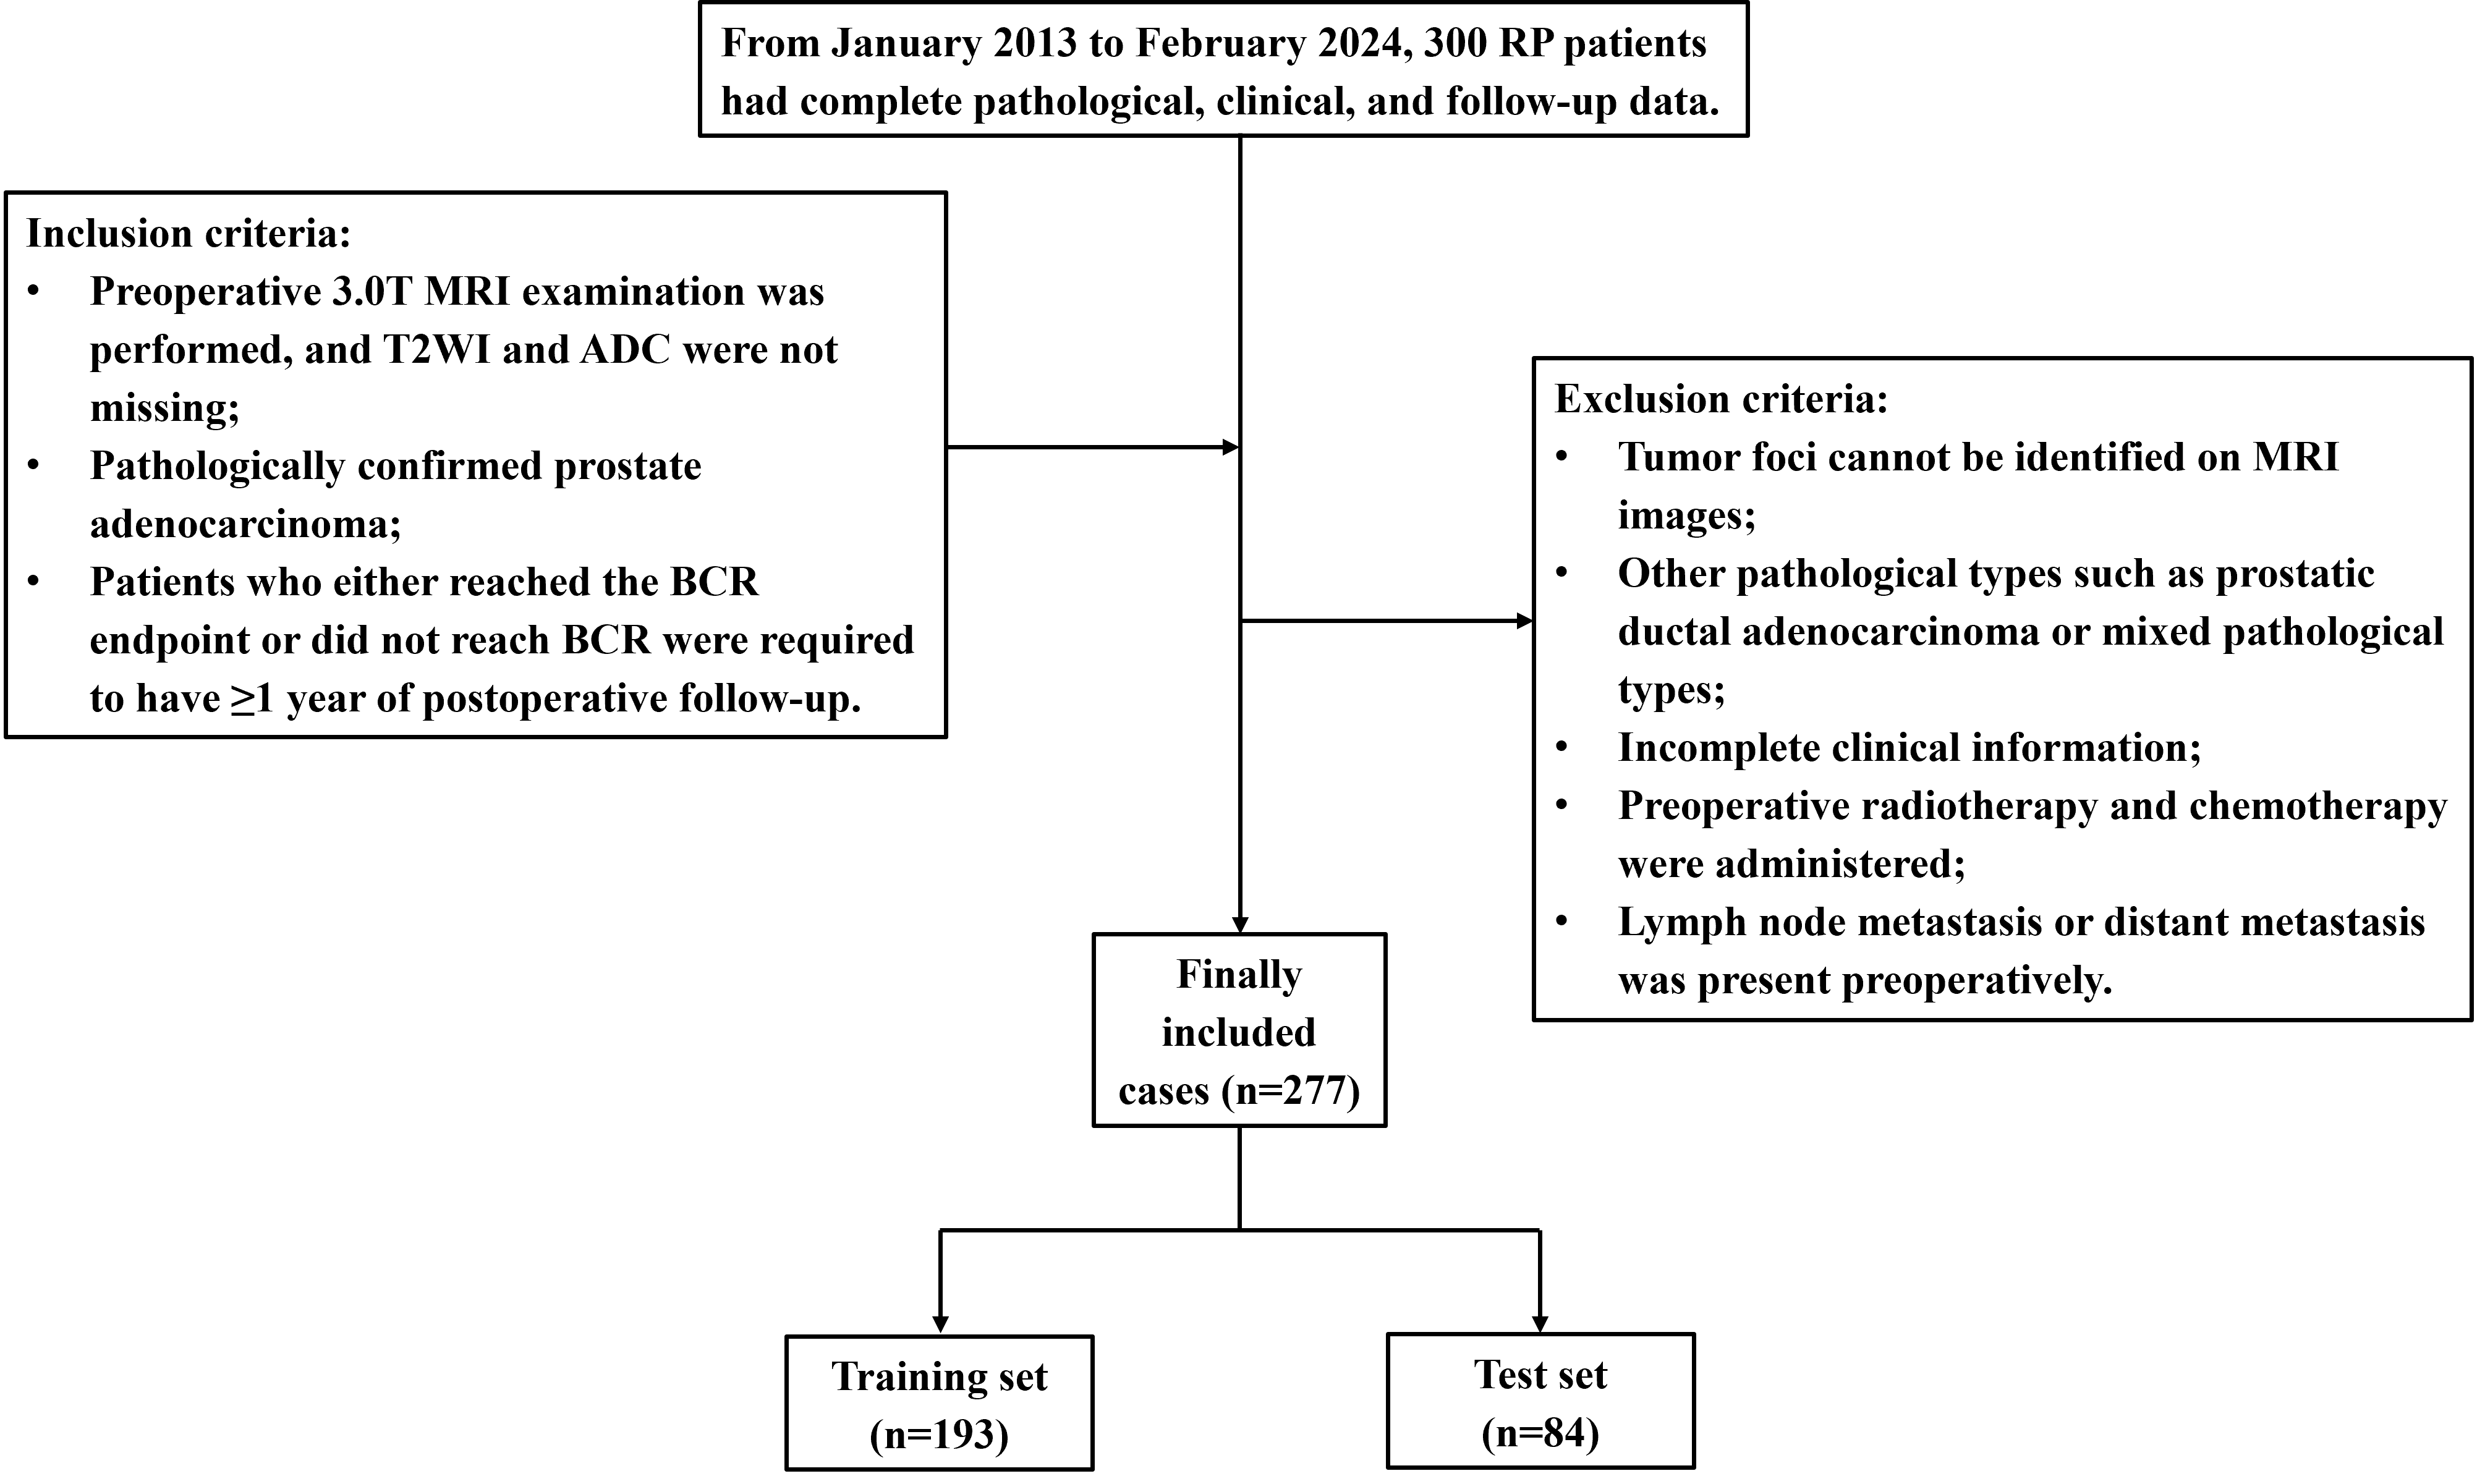


**Supplementary Figure 2** Flowchart of model construction based on clinical data, and intratumoral/peritumoral radiomic features.

**
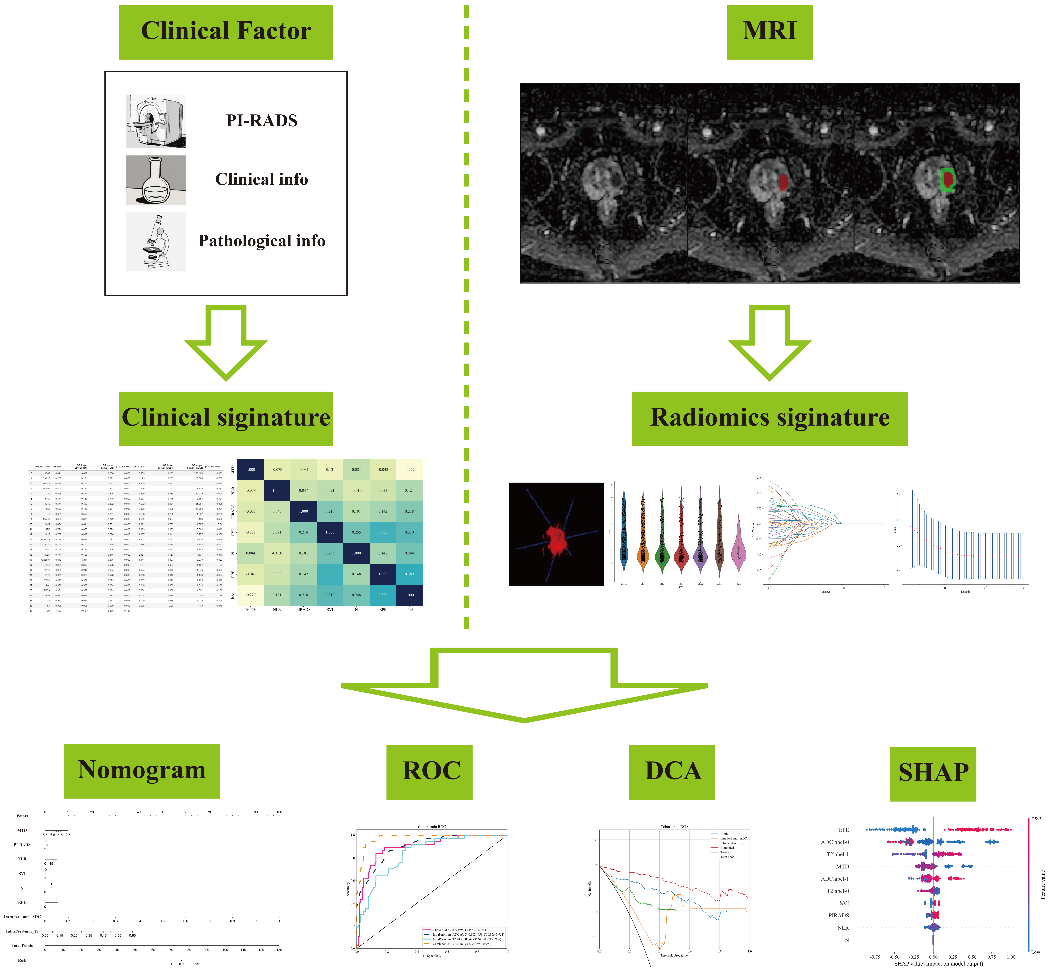
**

**Supplementary Figure 3** Incremental value of radiomics features. **A, B** Integrated Discrimination Improvement (IDI) and **C, D** Net Reclassification Improvement (NRI) comparisons between training and validation sets.

**
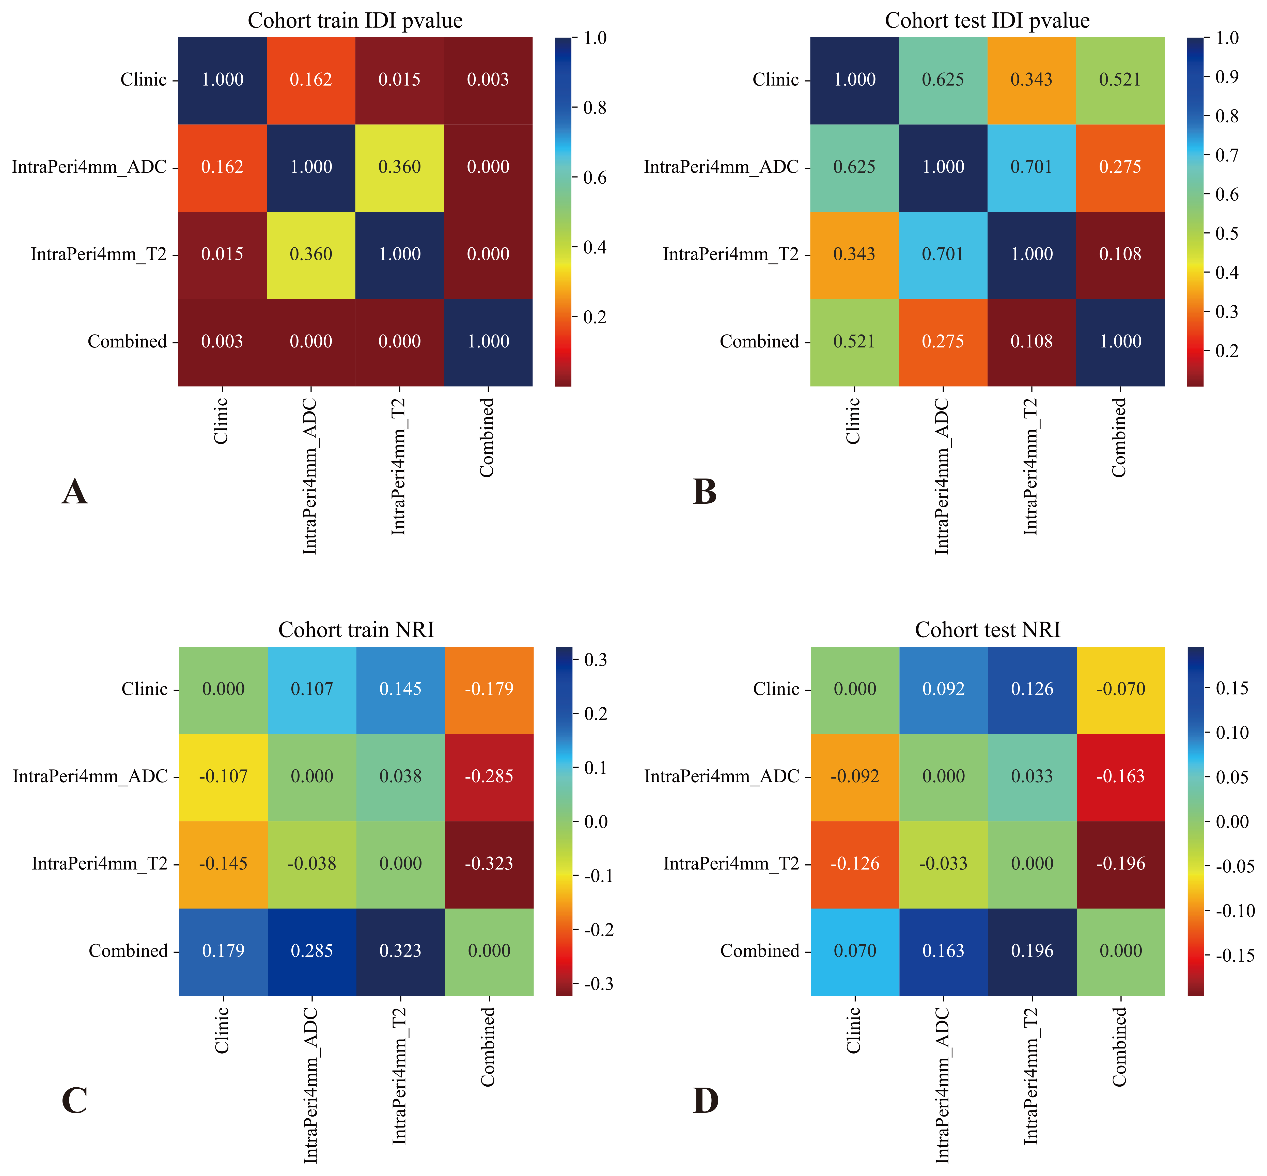
**
